# Supplementary material for: In Vivo PET Imaging of Monocytes Labeled with [89Zr]Zr-PLGA-NH2 Nanoparticles in Tumor and Staphylococcus aureus Infection Models
Source: MDPI journal article supplement (doi:10.3390/cancers13205069), 2021-10-10
Supplement: s1 [file s1]

# Supplementary Materials: In Vivo PET Imaging of Monocytes Labeled with [<sup>89</sup>Zr]Zr-PLGA-NH<sub>2</sub> Nanoparticles in Tumor and *Staphylococcus aureus* Infection Models

Massis Krekorian, Kimberley R.G. Cortenbach, Milou Boswinkel, Annemarie Kip, Gerben M. Franssen, Andor Veltien, Tom W.J. Scheenen, René Raavé, N. Koen van Riessen, Mangala Srinivas, I. Jolanda M. de Vries, Carl G. Figdor, Erik H.J.G. Aarntzen and Sandra Heskamp

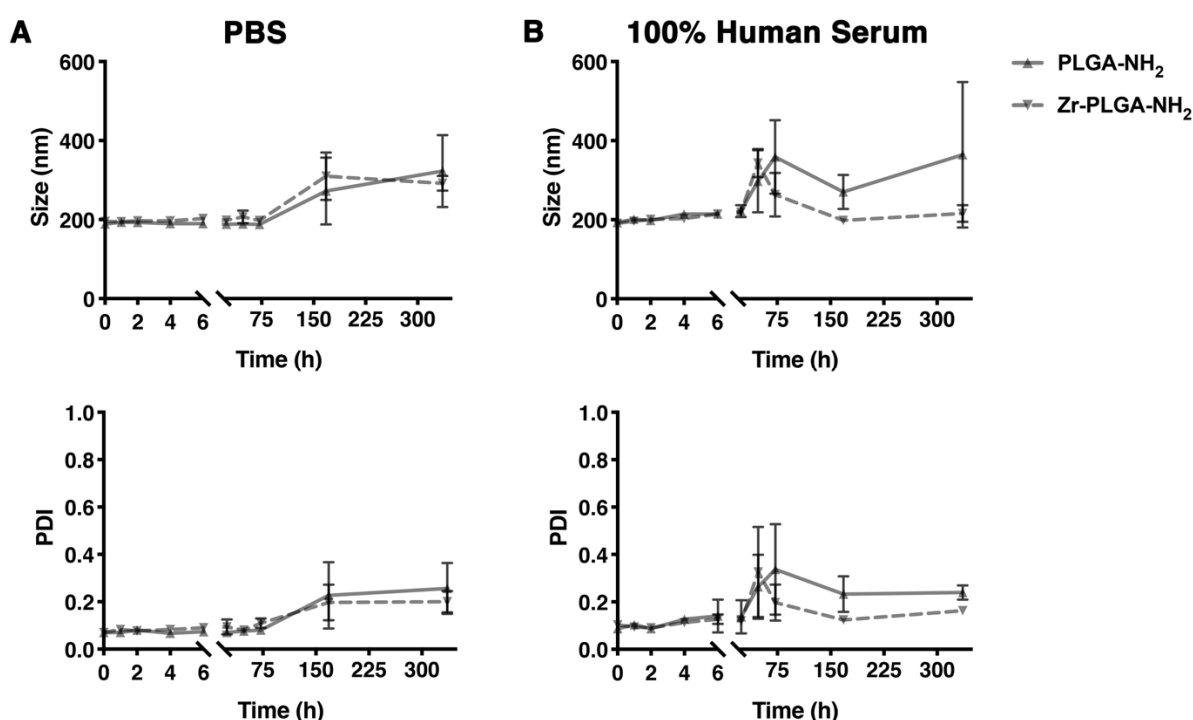

**Figure S1.** Over time particle stability in different buffers. Diameter and PDI measurements of PLGA-NH<sub>2</sub> and Zr-PLGA-NH<sub>2</sub> NPs incubated in (A) PBS and (B) 100% human serum at 37 °C for 0, 1, 2, 4, 6, 24, 48, 72, 168 and 336 hours. The mean and standard deviation of at least three independent experimental data sets is shown. Abbreviations: Poly(lactic-co-glycolic acid) with primary amine nanoparticles (PLGA-NH<sub>2</sub> NPs) and non-radioactive zirconium-labelled PLGA-NH<sub>2</sub> NPs (Zr-PLGA-NH<sub>2</sub>).

**Table S1.** Biodistribution of [<sup>89</sup>Zr]Zr-PLGA-NH<sub>2</sub> NPs at day 3 and 14 after intravenous tail injection in C57BL/6 mice. Data is expressed as %Injected Dose per gram (mean ± standard deviation, *n* = 3).

| Organs   | Day 3                         | Day 14                        |
|----------|-------------------------------|-------------------------------|
| Blood    | 0.40 ± 0.46                   | 0.16 ± 0.09                   |
| Spleen   | 0.23 ± 0.07 × 10 <sup>3</sup> | 0.18 ± 0.03 × 10 <sup>3</sup> |
| Liver    | 27.47 ± 3.38                  | 17.00 ± 1.85                  |
| Kidney   | 0.51 ± 0.09                   | 0.48 ± 0.06                   |
| Heart    | 0.50 ± 0.04                   | 0.54 ± 0.13                   |
| Lung     | 2.39 ± 0.60                   | 3.02 ± 1.15                   |
| Pancreas | 0.29 ± 0.04                   | 0.23 ± 0.06                   |
| Bladder  | 0.35 ± 0.03                   | 0.51 ± 0.08                   |
| Duodenum | 0.70 ± 0.16                   | 0.26 ± 0.08                   |
| Ileum    | 0.78 ± 0.38                   | 0.36 ± 0.11                   |
| Colon    | 0.15 ± 0.02                   | 0.29 ± 0.21                   |
| Brain    | 0.02 ± 0.00                   | 0.04 ± 0.02                   |

|                |              |              |
|----------------|--------------|--------------|
| Muscle         | 0.32 ± 0.11  | 0.16 ± 0.05  |
| LN (inguinal)* | 1.34 ± 0.23  | 2.42 ± 0.84  |
| Femur          | 6.07 ± 2.64  | 5.89 ± 0.06  |
| Bone marrow    | 14.90 ± 5.81 | 14.08 ± 2.70 |
| Thymus         | 0.33 ± 0.08  | 0.25 ± 0.04  |
| Brown fat      | 0.94 ± 0.19  | 1.07 ± 0.25  |
| Stomach        | 0.32 ± 0.02  | 0.24 ± 0.04  |
| Salivary gland | 0.43 ± 0.11  | 0.36 ± 0.07  |
| Knee           | 8.67 ± 2.20  | 7.24 ± 1.77  |

\* Abbreviations: LN, lymph node.

**Table S2.** Biodistribution of [<sup>89</sup>Zr]Zr-THP-1 cells at 24 hours after subcutaneous injection. Data is expressed as %Injected Dose per gram (mean ± standard deviation, *n* = 4).

| Organs         | [ <sup>89</sup> Zr]Zr-PLGA-NH <sub>2</sub><br>NPs | 10,000 [ <sup>89</sup> Zr]Zr-THP-1<br>cells | 100,000 [ <sup>89</sup> Zr]Zr-THP-1<br>cells |
|----------------|---------------------------------------------------|---------------------------------------------|----------------------------------------------|
| Blood          | 1.22 ± 0.43                                       | 0.81 ± 0.79                                 | 0.59 ± 0.11                                  |
| Matrigel       | 2.21 ± 1.19 × 10 <sup>3</sup>                     | 0.62 ± 0.44 × 10 <sup>3</sup>               | 1.00 ± 0.25 × 10 <sup>3</sup>                |
| Salivary gland | 0.58 ± 0.14                                       | 0.44 ± 0.49                                 | 0.29 ± 0.12                                  |
| LN (inguinal)* | 2.54 ± 1.84                                       | 15.24 ± 12.74                               | 2.93 ± 2.33                                  |
| Heart          | 0.41 ± 0.08                                       | 0.58 ± 0.56                                 | 0.20 ± 0.05                                  |
| Lung           | 1.27 ± 0.17                                       | 0.60 ± 0.41                                 | 0.44 ± 0.16                                  |
| Thymus         | 1.04 ± 0.23                                       | 1.76 ± 2.48                                 | 0.57 ± 0.50                                  |
| Bladder        | 0.89 ± 0.35                                       | 4.77 ± 4.10                                 | 1.10 ± 0.87                                  |
| Liver          | 0.74 ± 0.23                                       | 0.83 ± 0.47                                 | 0.25 ± 0.02                                  |
| Stomach        | 0.33 ± 0.06                                       | 1.01 ± 0.51                                 | 0.15 ± 0.04                                  |
| Duodenum       | 0.45 ± 0.20                                       | 1.09 ± 0.68                                 | 0.24 ± 0.06                                  |
| Ileum          | 0.69 ± 0.23                                       | 1.74 ± 0.60                                 | 0.31 ± 0.07                                  |
| Colon          | 0.50 ± 0.34                                       | 0.75 ± 0.42                                 | 0.18 ± 0.07                                  |
| Pancreas       | 0.40 ± 0.06                                       | 0.47 ± 0.19                                 | 0.17 ± 0.06                                  |
| Spleen         | 0.41 ± 0.10                                       | 0.61 ± 0.42                                 | 0.19 ± 0.04                                  |
| Kidney         | 0.77 ± 0.14                                       | 0.71 ± 0.26                                 | 0.33 ± 0.06                                  |
| Muscle         | 0.24 ± 0.07                                       | 0.49 ± 0.41                                 | 0.10 ± 0.08                                  |
| Knee           | 5.30 ± 1.52                                       | 2.24 ± 1.60                                 | 2.16 ± 0.45                                  |
| Bone marrow    | 1.81 ± 0.70                                       | 5.54 ± 4.88                                 | 1.35 ± 1.55                                  |
| Femur          | 4.15 ± 0.98                                       | 2.00 ± 1.73                                 | 1.56 ± 0.71                                  |
| Brown fat      | 0.64 ± 0.20                                       | 0.68 ± 0.62                                 | 0.36 ± 0.05                                  |
| Brain          | 0.07 ± 0.03                                       | 0.13 ± 0.06                                 | 0.04 ± 0.01                                  |

\* Abbreviations: LN, lymph node.

**Table S3.** Biodistribution of [<sup>89</sup>Zr]Zr-THP-1 cells at 24 hours after intravenous injection in *Staphylococcus aureus* and MDA-MB-231 tumor models. Data is expressed as %Injected Dose per gram (mean ± standard deviation, *n* = 4–5).

| Organs               | <i>Staphylococcus aureus</i> | MDA-MB-231 Tumor |
|----------------------|------------------------------|------------------|
| Blood                | 2.14 ± 0.65                  | 3.80 ± 4.04      |
| Infected Muscle (R)* | 2.66 ± 0.95                  | -                |
| Control Muscle (L)*  | 0.32 ± 0.08                  | -                |
| Tumor                | -                            | 1.17 ± 0.24      |
| Muscle foreleg (R)*  | 0.49 ± 0.08                  | 0.46 ± 0.19      |
| Salivary gland       | 0.63 ± 0.09                  | 0.62 ± 0.11      |
| LN *                 | 2.62 ± 0.41                  | 3.49 ± 1.00      |
| Heart                | 0.69 ± 0.11                  | 0.59 ± 0.07      |
| Lung                 | 43.19 ± 16.84                | 31.44 ± 9.86     |
| Thymus               | 2.04 ± 0.27                  | 2.03 ± 0.51      |
| Bladder              | 1.41 ± 0.51                  | 1.12 ± 0.30      |
| Liver                | 48.28 ± 5.88                 | 51.37 ± 5.89     |
| Stomach              | 0.50 ± 0.20                  | 0.47 ± 0.08      |
| Duodenum             | 0.87 ± 0.25                  | 0.64 ± 0.17      |
| Ileum                | 0.68 ± 0.20                  | 0.74 ± 0.12      |

|             |              |               |
|-------------|--------------|---------------|
| Colon       | 0.43 ± 0.11  | 0.40 ± 0.08   |
| Pancreas    | 0.46 ± 0.13  | 0.46 ± 0.06   |
| Spleen      | 46.67 ± 8.99 | 53.84 ± 20.78 |
| Kidney      | 1.59 ± 0.22  | 2.82 ± 0.65   |
| Knee        | 6.41 ± 2.40  | 8.82 ± 3.01   |
| Bone Marrow | 10.98 ± 3.35 | 21.64 ± 12.25 |
| Femur       | 5.19 ± 1.65  | 5.99 ± 3.64   |
| Brown Fat   | 1.43 ± 0.06  | 0.92 ± 0.15   |
| Brain       | 0.09 ± 0.02  | 0.08 ± 0.01   |

---

\* Abbreviations: LN, lymph node; Infection Muscle (R), Staphylococcus aureus in right hind leg; Control Muscle (L), PBS + Blood in left hind leg; Muscle foreleg (R), without injection.
